# Supplementary material
Source: PubMed Central journal article supplement (PMC10566306)
Supplement: NIHMS1933780-supplement-Supplement.pdf [file NIHMS1933780-supplement-Supplement.pdf]

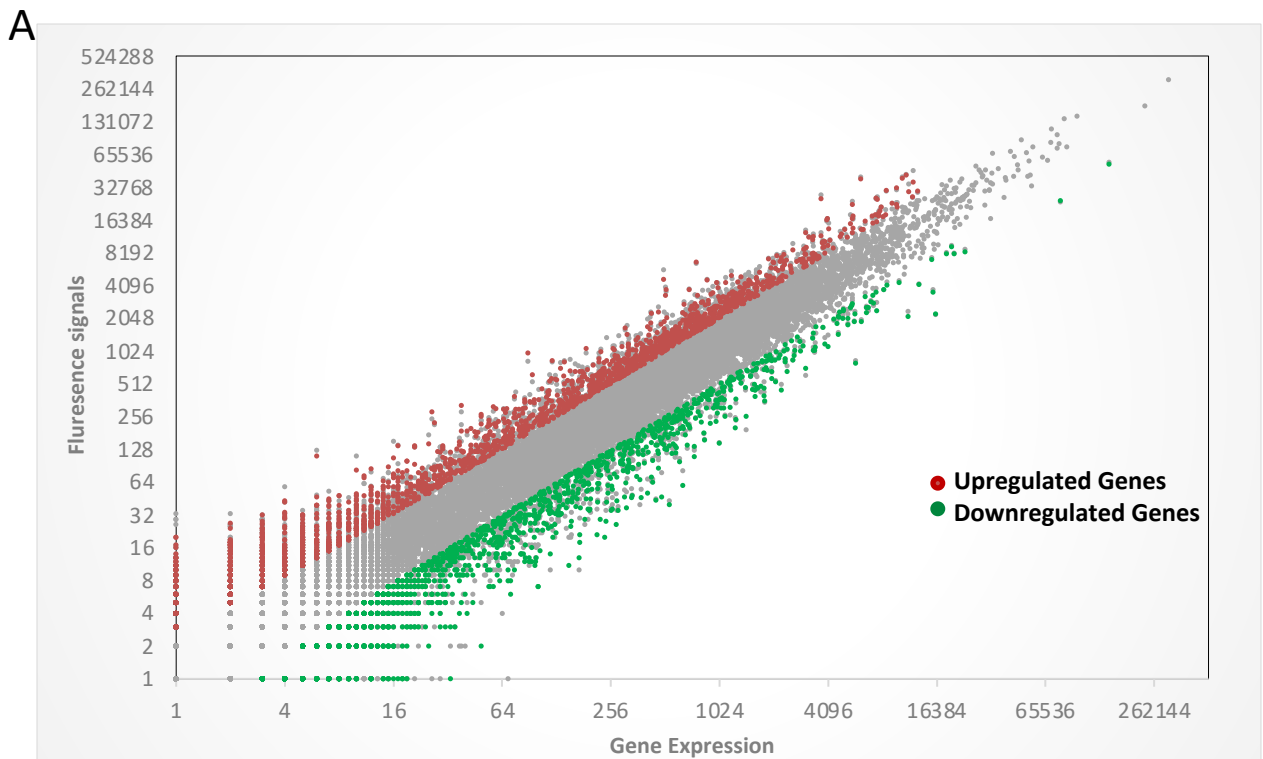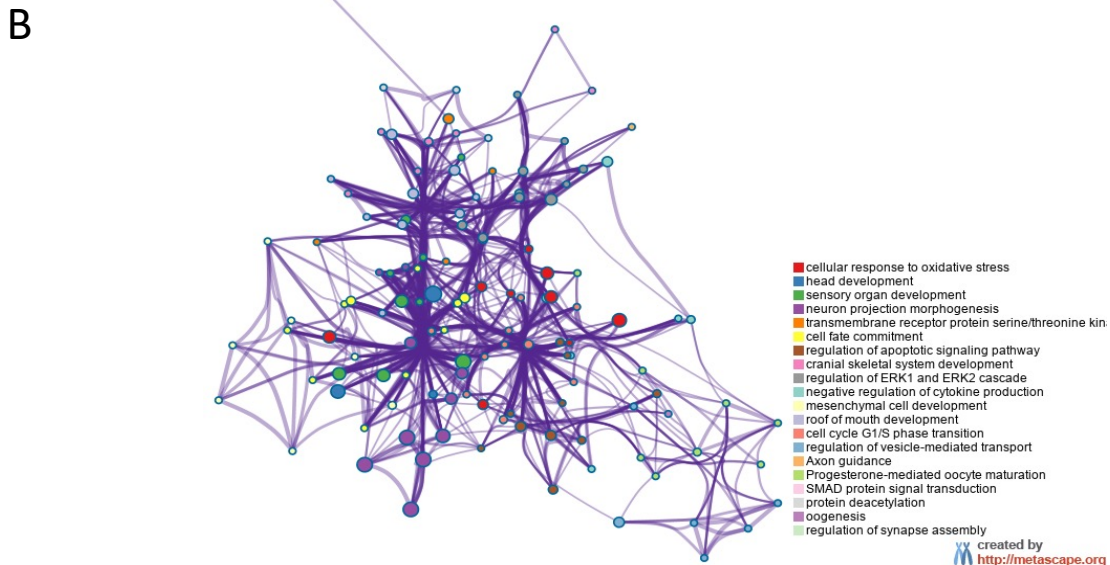

- A. GSE77251 Pubmed database was analyzed. Dots represented regulated genes in human primary cells responsive to miR-449b. Red, upregulation; Green, downregulation. Grey, no changes.
- B. Metascape online Go analysis on the biological pathways regulated by these 72 genes.



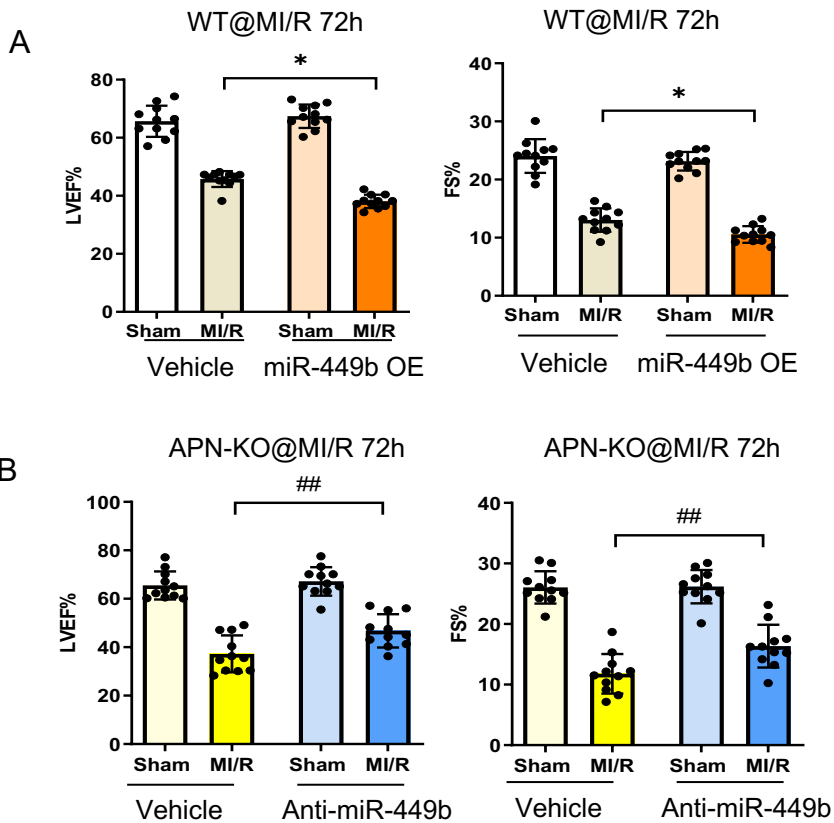

Supplemental Figure 3

- A. Administration of miR-449b mimic (miR-449b OE) significantly attenuated cardiac function in WT mice subjected to MI/R (30 minutes ischemia and 72 hours reperfusion). LVEF, left ventricle ejection fraction; FS, fraction shortening.
- B. The cardiac function was significantly increased in anti-miR449b treated APN-KO mice following MI/R (30minutes ischemia and 72 hours reperfusion). APN-KO, adiponectin knockout.

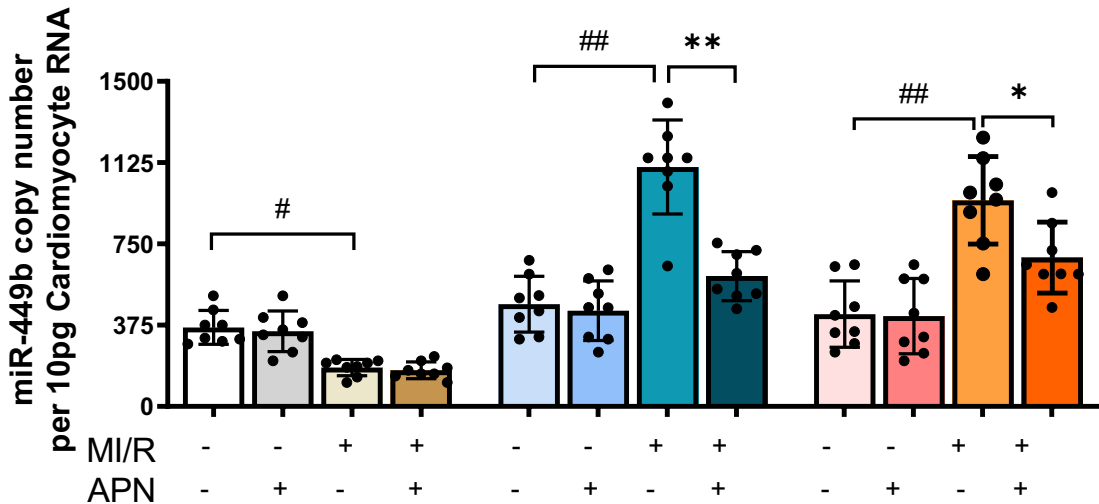

**Digital quantitative PCR validation using miRNA specific primer assays for miRNA-449b in cardiomyocytes isolated from WT, HFD and APNKO animals after MI/R surgery with or without APN administrated. \* $p < 0.05$ , \*\* $p < 0.01$  versus respective group. # $p < 0.05$ , ## $p < 0.01$  versus MI/R group. Statistical significance was evaluated by a two-way ANOVA. Post hoc pairwise tests for indicated group pairs were performed after Tukey correction. MI/R, myocardial ischemia/reperfusion. HFD, High fat diet; APN, Adiponectin.**

Supplemental Figure 4

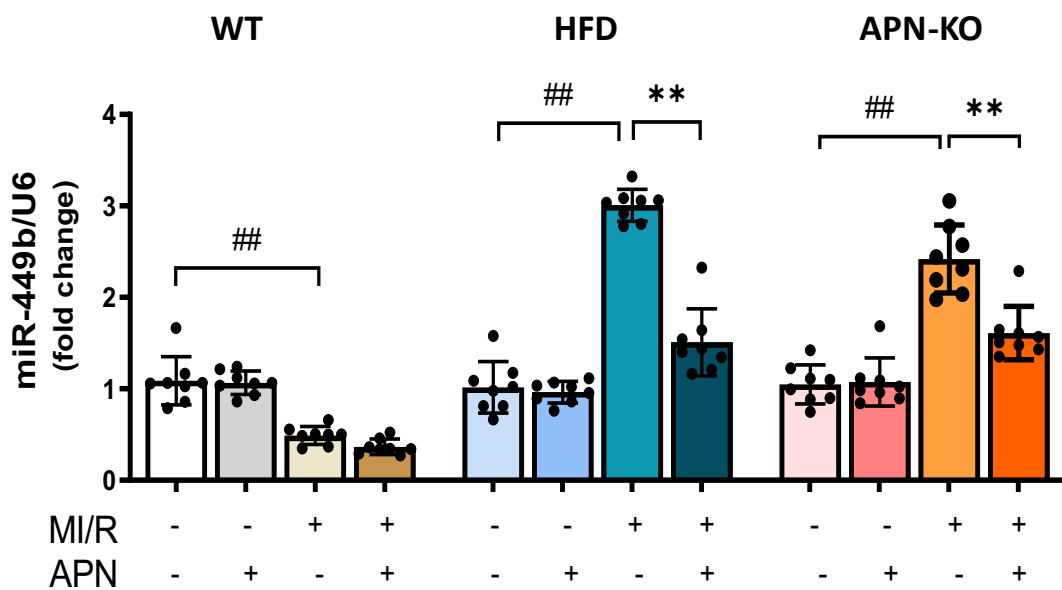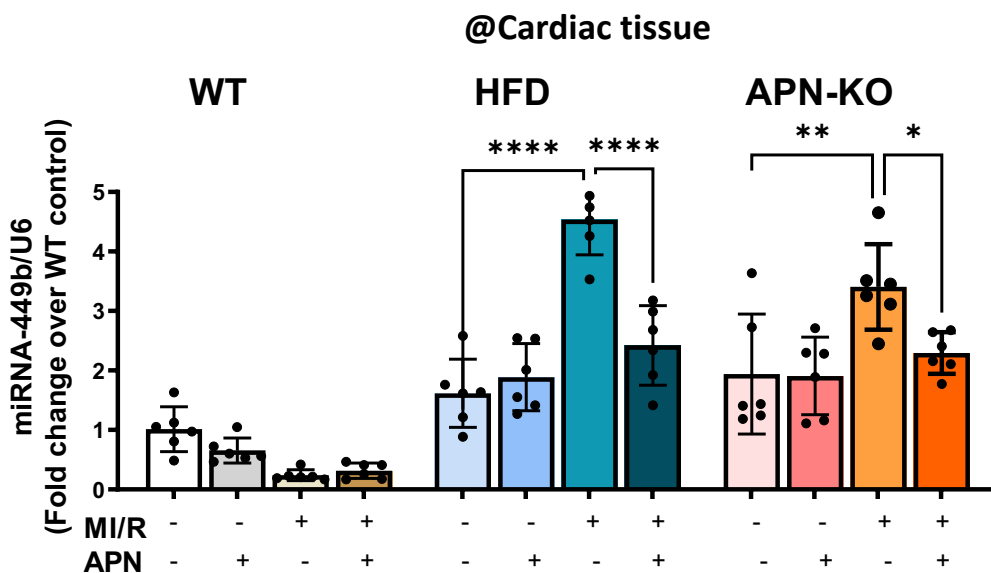

**Real-Time quantitative PCR validation using miRNA specific primer assays for miRNA-449b in cardiac tissue and cardiomyocytes isolated from WT, HFD and APNKO animals after MI/R surgery with or without APN administrated. The relative fold calculation set WT control as 1. \* $p < 0.05$ , \*\* $p < 0.01$  versus respective group. ## $p < 0.01$  versus WT-MI/R group. Statistical significance was evaluated by a two-way ANOVA. Post hoc pairwise tests for indicated group pairs were performed after Tukey correction. MI/R, myocardial ischemia/reperfusion. HFD, High fat diet; APN. Adiponectin.**

**Table1 Correlation between IHD without Diabetes and miR-449b  
( multivariate regression analysis)**

| <b>Variable</b>              | <b>OR</b> | <b>ORCI95%</b> | <b>P</b> |
|------------------------------|-----------|----------------|----------|
| miR-449b                     | 0.159     | (0.004-0.964)  | 0.051    |
| Sex(M/F)                     | 5.495     | (0.322-93.906) | 0.239    |
| Age(year)                    | 1.100*    | (1.001-1.209)  | 0.048    |
| Number of lesion<br>(number) | 1.684     | (0.616-2.859)  | 0.310    |
| HDL-C(mmol/L)                | 0.415     | (0.060-2.859)  | 0.372    |
| LDL-C(mmol/L)                | 0.552     | (0.096-3.166)  | 0.505    |
